# Supplementary material for: Change, stability, and instability in the Pavlovian guidance of behaviour from adolescence to young adulthood
Source: PLOS journal article supplement (doi:10.1371/journal.pcbi.1006679), 2018-12-31
Supplement: S9 (10.1371/journal.pcbi.1006679.s009) [file journal.pcbi.1006679.s009]

## Appendix S9: Latent Change Score Modelling

Here we illustrate the general structure of LCSMs that we used, and we describe an important control analysis, namely whether changes in parameters may have differed depending on baseline age or IQ.

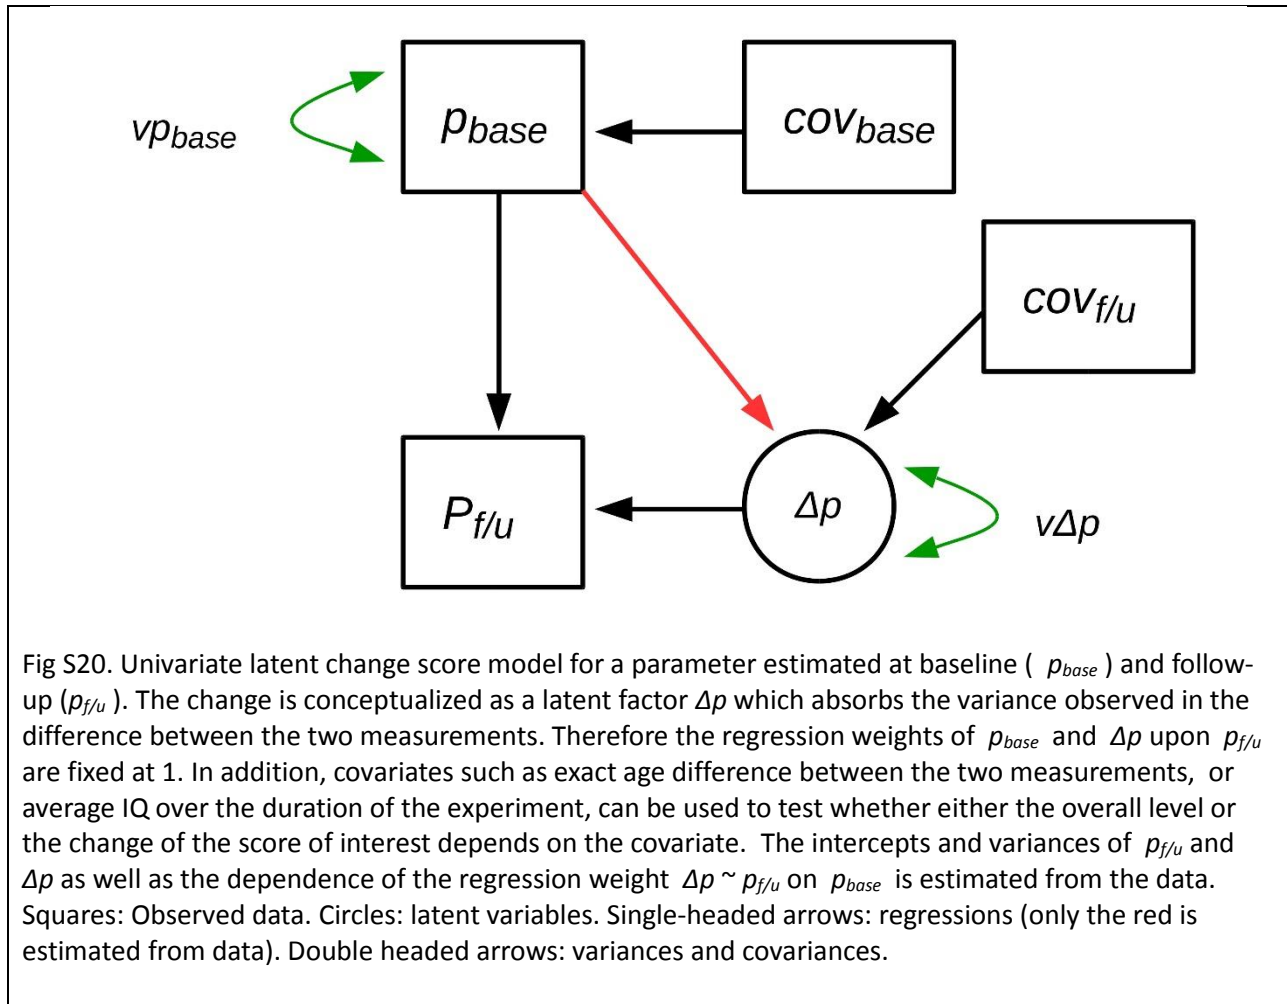

In order to see whether age and IQ may have accounted for changes in Pavlovian bias, we augmented the latent change score model (LCSM) with an age (mean over the two testing occasions) and baseline IQ, which were entered as covariates in the latent change score. We found no dependence of the change in Pavlovian bias on age (regression  $p=0.75$  within the LCSM) but there was a small, significant dependence of change in Pavlovian bias on IQ,  $p=0.028$ ,  $\beta=-0.008$ ,  $r^2 = 0.005$ . This means that the higher the IQ, the change in Pavlovian bias was slightly smaller/more negative than would be predicted on the basis of the other predictors in the LCSM, but this only accounted for 0.5% of the variance in change.
