# Supplementary material for: Change, stability, and instability in the Pavlovian guidance of behaviour from adolescence to young adulthood
Source: PLOS journal article supplement (doi:10.1371/journal.pcbi.1006679), 2018-12-31
Supplement: S16 (10.1371/journal.pcbi.1006679.s016) [file journal.pcbi.1006679.s016]

| Measure                                                   | Pearson <i>r</i> | P value |
|-----------------------------------------------------------|------------------|---------|
| Change in Pavlovian – Congruent conditions:               |                  |         |
| r( change in G2W performance , reduction of Pav. Bias )   | -0.11            | 0.010   |
| r( change in NG2AL performance , reduction of Pav. Bias ) | -0.20            | 1.7e-06 |
| Change in Pavlovian – Incongruent conditions:             |                  |         |
| r( change in NG2W performance , reduction of Pav. Bias )  | 0.33             | < 1e-10 |
| r( change in G2AP performance , reduction of Pav. Bias )  | 0.62             | < 1e-10 |

Table S3. Support for the theoretically expected relationship between Pavlovian bias and performance. Other things being equal, a decrease in Pavlovian bias should improve performance in the Pavlovian-inconsistent conditions (+ve pearson *r* by convention in this table) and decrease performance in the Pavlovian-consistent conditions (-ve *r*). To test this, we tested the hypothesis on each condition separately, adopting a multiple comparison threshold of  $p=0.05/4 = 0.0125$ . We found significant evidence for all expected correlations.
